# Supplementary material
Source: PubMed Central journal article supplement (PMC9445915)
Supplement: NIHMS1826205-supplement-Supp1.pdf [file NIHMS1826205-supplement-Supp1.pdf]

## SUPPLEMENTARY MATERIAL

**Supplementary Table 1. Baseline patient demographics, disease characteristics, and prior therapies according to subgroups defined by (A) progression-free interval following penultimate platinum-based chemotherapy regimen, (B) number of prior chemotherapy regimens, (C) prior bevacizumab use.**

**A. Progression-free interval following penultimate platinum-based chemotherapy regimen**

| Characteristic                                                           | PFI 6–≤12 months  |                | PFI >12 months    |                  |
|--------------------------------------------------------------------------|-------------------|----------------|-------------------|------------------|
|                                                                          | Rucaparib (n=151) | Placebo (n=76) | Rucaparib (n=224) | Placebo (n=113)  |
| Age, median (range), y                                                   | 61 (42–83)        | 65 (40–78)     | 61 (39–84)        | 60 (36–85)       |
| <b>Diagnosis, n (%)<sup>a</sup></b>                                      |                   |                |                   |                  |
| Epithelial ovarian cancer                                                | 126 (83.4)        | 60 (78.9)      | 186 (83.0)        | 99 (87.6)        |
| Fallopian tube cancer                                                    | 13 (8.6)          | 3 (3.9)        | 19 (8.5)          | 7 (6.2)          |
| Primary peritoneal cancer                                                | 12 (7.9)          | 13 (17.1)      | 19 (8.5)          | 6 (5.3)          |
| <b>Histology, n (%)</b>                                                  |                   |                |                   |                  |
| Serous                                                                   | 143 (94.7)        | 72 (94.7)      | 214 (95.5)        | 107 (94.7)       |
| Endometrioid                                                             | 7 (4.6)           | 4 (5.3)        | 9 (4.0)           | 3 (2.7)          |
| Other or mixed                                                           | 1 (0.7)           | 0 (0)          | 1 (0.4)           | 3 (2.7)          |
| <b>Bulky disease per independent radiological review, n (%)</b>          |                   |                |                   |                  |
| Yes <sup>b</sup>                                                         | 38 (25.2)         | 9 (11.8)       | 33 (14.7)         | 20 (17.7)        |
| No <sup>c</sup>                                                          | 113 (74.8)        | 67 (88.2)      | 191 (85.3)        | 93 (82.3)        |
| <b>BRCA and LOH status, n (%)</b>                                        |                   |                |                   |                  |
| BRCA mutant                                                              | 54 (35.8)         | 27 (35.5)      | 76 (33.9)         | 39 (34.5)        |
| BRCA wild type                                                           | 97 (64.2)         | 49 (64.5)      | 148 (66.1)        | 74 (65.5)        |
| LOH high                                                                 | 38 (25.2)         | 20 (26.3)      | 68 (30.4)         | 32 (28.3)        |
| LOH low                                                                  | 39 (25.8)         | 18 (23.7)      | 68 (30.4)         | 36 (31.9)        |
| LOH indeterminate <sup>d</sup>                                           | 20 (13.2)         | 11 (14.5)      | 12 (5.4)          | 6 (5.3)          |
| <b>ECOG PS 0, n (%)</b>                                                  | 114 (75.5)        | 52 (68.4)      | 166 (74.1)        | 84 (74.3)        |
| <b>No. of prior chemotherapy regimens, median (range)</b>                | 3 (2–6)           | 2 (2–5)        | 2 (2–5)           | 2 (2–6)          |
| 2, n (%)                                                                 | 71 (47.0)         | 40 (52.6)      | 160 (71.4)        | 84 (74.3)        |
| 3, n (%)                                                                 | 59 (39.1)         | 22 (28.9)      | 49 (21.9)         | 20 (17.7)        |
| ≥4, n (%)                                                                | 21 (13.9)         | 14 (18.4)      | 15 (6.7)          | 9 (8.0)          |
| <b>Previous bevacizumab use, n (%)</b>                                   | 31 (20.5)         | 19 (25.0)      | 52 (23.2)         | 24 (21.2)        |
| <b>Time to progression with penultimate platinum, median (range), mo</b> | 9.6 (5.8–26.6)    | 9.7 (6.0–44.3) | 19.7 (6.4–120.0)  | 21.2 (8.5–238.5) |
| <b>Response to last platinum, n (%)</b>                                  |                   |                |                   |                  |
| CR per RECIST                                                            | 44 (29.1)         | 23 (30.3)      | 82 (36.6)         | 41 (36.3)        |

|                                                                                                                                                                                                                                                                                                                                                                                                                                                                                                                                                                                                                                                                                                                                                                                                                                                     |            |           |            |           |
|-----------------------------------------------------------------------------------------------------------------------------------------------------------------------------------------------------------------------------------------------------------------------------------------------------------------------------------------------------------------------------------------------------------------------------------------------------------------------------------------------------------------------------------------------------------------------------------------------------------------------------------------------------------------------------------------------------------------------------------------------------------------------------------------------------------------------------------------------------|------------|-----------|------------|-----------|
| PR per RECIST or serological response per GCIIG CA-125 criteria                                                                                                                                                                                                                                                                                                                                                                                                                                                                                                                                                                                                                                                                                                                                                                                     | 107 (70.9) | 53 (69.7) | 142 (63.4) | 71 (63.7) |
| <p><sup>a</sup>One patient (0.9%) in the placebo group with PFI following penultimate platinum-based chemotherapy regimen &gt;12 months had a diagnosis of high-grade serous adenocarcinoma that was fallopian and/or ovarian in origin. <sup>b</sup>Bulky residual disease was defined as any lesion &gt;2 cm. <sup>c</sup>No bulky residual disease was defined as no disease or all lesions ≤2 cm. <sup>d</sup>Tumor sample was not evaluable for percentage of genomic LOH due to low tumor content or low aneuploidy.</p> <p>CA-125, cancer antigen 125; CR, complete response; ECOG PS, Eastern Cooperative Oncology Group performance status; GCIIG, Gynecologic Cancer InterGroup; LOH, loss of heterozygosity; PFI, progression-free interval; PR, partial response; RECIST, Response Evaluation Criteria In Solid Tumors version 1.1.</p> |            |           |            |           |

## B. Number of prior chemotherapy regimens

| Characteristic                                                                                                                                                                                                                                                                                                                                                                                                                                                                                                                                                                                                                                                                                                                                                 | Two prior chemotherapy regimens |                     | ≥3 Prior chemotherapy regimens |                    |
|----------------------------------------------------------------------------------------------------------------------------------------------------------------------------------------------------------------------------------------------------------------------------------------------------------------------------------------------------------------------------------------------------------------------------------------------------------------------------------------------------------------------------------------------------------------------------------------------------------------------------------------------------------------------------------------------------------------------------------------------------------------|---------------------------------|---------------------|--------------------------------|--------------------|
|                                                                                                                                                                                                                                                                                                                                                                                                                                                                                                                                                                                                                                                                                                                                                                | Rucaparib<br>(n=231)            | Placebo<br>(n=124)  | Rucaparib<br>(n=144)           | Placebo<br>(n=65)  |
| <b>Age, median (range), y</b>                                                                                                                                                                                                                                                                                                                                                                                                                                                                                                                                                                                                                                                                                                                                  | 61 (39–84)                      | 61 (36–85)          | 61 (42–83)                     | 63 (41–78)         |
| <b>Diagnosis, n (%)<sup>a</sup></b>                                                                                                                                                                                                                                                                                                                                                                                                                                                                                                                                                                                                                                                                                                                            |                                 |                     |                                |                    |
| Epithelial ovarian cancer                                                                                                                                                                                                                                                                                                                                                                                                                                                                                                                                                                                                                                                                                                                                      | 186 (80.5)                      | 103 (83.1)          | 126 (87.5)                     | 56 (86.2)          |
| Fallopian tube cancer                                                                                                                                                                                                                                                                                                                                                                                                                                                                                                                                                                                                                                                                                                                                          | 21 (9.1)                        | 6 (4.8)             | 11 (7.6)                       | 4 (6.2)            |
| Primary peritoneal cancer                                                                                                                                                                                                                                                                                                                                                                                                                                                                                                                                                                                                                                                                                                                                      | 24 (10.4)                       | 14 (11.3)           | 7 (4.9)                        | 5 (7.7)            |
| <b>Histology, n (%)</b>                                                                                                                                                                                                                                                                                                                                                                                                                                                                                                                                                                                                                                                                                                                                        |                                 |                     |                                |                    |
| Serous                                                                                                                                                                                                                                                                                                                                                                                                                                                                                                                                                                                                                                                                                                                                                         | 223 (96.5)                      | 119 (96.0)          | 134 (93.1)                     | 60 (92.3)          |
| Endometrioid                                                                                                                                                                                                                                                                                                                                                                                                                                                                                                                                                                                                                                                                                                                                                   | 6 (2.6)                         | 3 (2.4)             | 10 (6.9)                       | 4 (6.2)            |
| Other or mixed                                                                                                                                                                                                                                                                                                                                                                                                                                                                                                                                                                                                                                                                                                                                                 | 2 (0.9)                         | 2 (1.6)             | 0                              | 1 (1.5)            |
| <b>Bulky disease per independent radiological review, n (%)</b>                                                                                                                                                                                                                                                                                                                                                                                                                                                                                                                                                                                                                                                                                                |                                 |                     |                                |                    |
| Yes <sup>b</sup>                                                                                                                                                                                                                                                                                                                                                                                                                                                                                                                                                                                                                                                                                                                                               | 44 (19.0)                       | 17 (13.7)           | 27 (18.8)                      | 12 (18.5)          |
| No <sup>c</sup>                                                                                                                                                                                                                                                                                                                                                                                                                                                                                                                                                                                                                                                                                                                                                | 187 (81.0)                      | 107 (86.3)          | 117 (81.3)                     | 53 (81.5)          |
| <b>BRCA and LOH status, n (%)</b>                                                                                                                                                                                                                                                                                                                                                                                                                                                                                                                                                                                                                                                                                                                              |                                 |                     |                                |                    |
| BRCA mutant                                                                                                                                                                                                                                                                                                                                                                                                                                                                                                                                                                                                                                                                                                                                                    | 73 (31.6)                       | 40 (32.3)           | 57 (39.6)                      | 26 (40.0)          |
| BRCA wild type                                                                                                                                                                                                                                                                                                                                                                                                                                                                                                                                                                                                                                                                                                                                                 | 158 (68.4)                      | 84 (67.7)           | 87 (60.4)                      | 39 (60.0)          |
| LOH high                                                                                                                                                                                                                                                                                                                                                                                                                                                                                                                                                                                                                                                                                                                                                       | 63 (27.3)                       | 35 (28.2)           | 43 (29.9)                      | 17 (26.2)          |
| LOH low                                                                                                                                                                                                                                                                                                                                                                                                                                                                                                                                                                                                                                                                                                                                                        | 73 (31.6)                       | 39 (31.5)           | 34 (23.6)                      | 15 (23.1)          |
| LOH indeterminate <sup>d</sup>                                                                                                                                                                                                                                                                                                                                                                                                                                                                                                                                                                                                                                                                                                                                 | 22 (9.5)                        | 10 (8.1)            | 10 (6.9)                       | 7 (10.8)           |
| <b>ECOG PS 0, n (%)</b>                                                                                                                                                                                                                                                                                                                                                                                                                                                                                                                                                                                                                                                                                                                                        | 168 (72.7)                      | 88 (71.0)           | 112 (77.8)                     | 48 (73.8)          |
| <b>No. of prior chemotherapy regimens, median (range)</b>                                                                                                                                                                                                                                                                                                                                                                                                                                                                                                                                                                                                                                                                                                      | 2 (2–2)                         | 2 (2–2)             | 3 (3–6)                        | 3 (3–6)            |
| 2, n (%)                                                                                                                                                                                                                                                                                                                                                                                                                                                                                                                                                                                                                                                                                                                                                       | 231 (100.0)                     | 124 (100.0)         | 0                              | 0                  |
| 3, n (%)                                                                                                                                                                                                                                                                                                                                                                                                                                                                                                                                                                                                                                                                                                                                                       | 0                               | 0                   | 108 (75.0)                     | 42 (64.6)          |
| ≥4, n (%)                                                                                                                                                                                                                                                                                                                                                                                                                                                                                                                                                                                                                                                                                                                                                      | 0                               | 0                   | 36 (25.0)                      | 23 (35.4)          |
| <b>Previous bevacizumab use, n (%)</b>                                                                                                                                                                                                                                                                                                                                                                                                                                                                                                                                                                                                                                                                                                                         | 52 (22.5)                       | 23 (18.5)           | 31 (21.5)                      | 20 (30.8)          |
| <b>Time to progression with penultimate platinum, median (range), mo</b>                                                                                                                                                                                                                                                                                                                                                                                                                                                                                                                                                                                                                                                                                       | 16.0<br>(6.1–120.0)             | 18.0<br>(6.0–238.5) | 10.6<br>(5.8–81.3)             | 11.5<br>(6.4–58.0) |
| 6 to ≤12 mo, n (%)                                                                                                                                                                                                                                                                                                                                                                                                                                                                                                                                                                                                                                                                                                                                             | 71 (30.7)                       | 40 (32.3)           | 80 (55.6)                      | 36 (55.4)          |
| >12 mo, n (%)                                                                                                                                                                                                                                                                                                                                                                                                                                                                                                                                                                                                                                                                                                                                                  | 160 (69.3)                      | 84 (67.7)           | 64 (44.4)                      | 29 (44.6)          |
| <b>Response to last platinum, n (%)</b>                                                                                                                                                                                                                                                                                                                                                                                                                                                                                                                                                                                                                                                                                                                        |                                 |                     |                                |                    |
| CR per RECIST                                                                                                                                                                                                                                                                                                                                                                                                                                                                                                                                                                                                                                                                                                                                                  | 76 (32.9)                       | 42 (33.9)           | 50 (34.7)                      | 22 (33.8)          |
| PR per RECIST or serological response per GCIG CA-125 criteria                                                                                                                                                                                                                                                                                                                                                                                                                                                                                                                                                                                                                                                                                                 | 155 (67.1)                      | 82 (66.1)           | 94 (65.3)                      | 43 (66.2)          |
| <sup>a</sup> One patient (0.8%) in the placebo group with 2 prior chemotherapy regimens had a diagnosis of high-grade serous adenocarcinoma that was fallopian tube and/or ovarian in origin. <sup>b</sup> Bulky residual disease was defined as any lesion >2 cm. <sup>c</sup> No bulky residual disease was defined as no disease or all tumors ≤2 cm. <sup>d</sup> Tumor sample was not evaluable for percentage of genomic LOH due to low tumor content or low aneuploidy.<br>CA-125, cancer antigen 125; CR, complete response; ECOG PS, Eastern Cooperative Oncology Group performance status; GCIG, Gynecologic Cancer InterGroup; LOH, loss of heterozygosity; PR, partial response; RECIST, Response Evaluation Criteria In Solid Tumors version 1.1. |                                 |                     |                                |                    |

## C. Prior bevacizumab use

| Characteristic                                                           | Prior bevacizumab |                | No prior bevacizumab |                 |
|--------------------------------------------------------------------------|-------------------|----------------|----------------------|-----------------|
|                                                                          | Rucaparib (n=83)  | Placebo (n=43) | Rucaparib (n=292)    | Placebo (n=146) |
| <b>Age, median (range), y</b>                                            | 60 (39–79)        | 62 (41–84)     | 61 (41–84)           | 62 (36–85)      |
| <b>Diagnosis, n (%)<sup>a</sup></b>                                      |                   |                |                      |                 |
| Epithelial ovarian cancer                                                | 66 (79.5)         | 36 (83.7)      | 246 (84.2)           | 123 (84.2)      |
| Fallopian tube cancer                                                    | 9 (10.8)          | 2 (4.7)        | 23 (7.9)             | 8 (5.5)         |
| Primary peritoneal cancer                                                | 8 (9.6)           | 5 (11.6)       | 23 (7.9)             | 14 (9.6)        |
| <b>Histology, n (%)</b>                                                  |                   |                |                      |                 |
| Serous                                                                   | 80 (96.4)         | 41 (95.3)      | 277 (94.9)           | 138 (94.5)      |
| Endometrioid                                                             | 3 (3.6)           | 1 (2.3)        | 13 (4.5)             | 6 (4.1)         |
| Other or mixed                                                           | 0                 | 1 (2.3)        | 2 (0.7)              | 2 (1.4)         |
| <b>Bulky disease per independent radiological review</b>                 |                   |                |                      |                 |
| Yes, n (%) <sup>b</sup>                                                  | 14 (16.9)         | 8 (18.6)       | 57 (19.5)            | 21 (14.4)       |
| No, n (%) <sup>c</sup>                                                   | 69 (83.1)         | 35 (81.4)      | 235 (80.5)           | 125 (85.6)      |
| <b>BRCA and LOH status, n (%)</b>                                        |                   |                |                      |                 |
| BRCA mutant                                                              | 28 (33.7)         | 11 (25.6)      | 102 (34.9)           | 55 (37.7)       |
| BRCA wild type                                                           | 55 (66.3)         | 32 (74.4)      | 190 (65.1)           | 91 (62.3)       |
| LOH high                                                                 | 24 (28.9)         | 15 (34.9)      | 82 (28.1)            | 37 (25.3)       |
| LOH low                                                                  | 28 (33.7)         | 12 (27.9)      | 79 (27.1)            | 42 (28.8)       |
| LOH indeterminate <sup>d</sup>                                           | 3 (3.6)           | 5 (11.6)       | 29 (9.9)             | 12 (8.2)        |
| <b>ECOG PS 0, n (%)</b>                                                  | 66 (79.5)         | 35 (81.4)      | 214 (73.3)           | 101 (69.2)      |
| <b>No. of prior chemotherapy regimens, median (range)</b>                |                   |                |                      |                 |
| 2, n (%)                                                                 | 52 (62.7)         | 23 (53.5)      | 179 (61.3)           | 101 (69.2)      |
| 3, n (%)                                                                 | 25 (30.1)         | 9 (20.9)       | 83 (28.4)            | 33 (22.6)       |
| ≥4, n (%)                                                                | 6 (7.2)           | 11 (25.6)      | 30 (10.3)            | 12 (8.2)        |
| <b>Prior bevacizumab exposure, n (%)</b>                                 |                   |                |                      |                 |
| In first line                                                            | 50 (60.2)         | 21 (48.8)      | 0                    | 0               |
| In second line or later                                                  | 37 (44.6)         | 23 (53.5)      | 0                    | 0               |
| With chemotherapy in last treatment before ARIEL3 <sup>e</sup>           | 14 (16.9)         | 9 (20.9)       | 0                    | 0               |
| <b>Time to progression with penultimate platinum, median (range), mo</b> |                   |                |                      |                 |
| 6 to ≤12 mo, n (%)                                                       | 31 (37.3)         | 19 (44.2)      | 120 (41.1)           | 57 (39.0)       |
| >12 mo, n (%)                                                            | 52 (62.7)         | 24 (55.8)      | 172 (58.9)           | 89 (61.0)       |
| <b>Response to last platinum, n (%)</b>                                  |                   |                |                      |                 |
| CR per RECIST                                                            | 30 (36.1)         | 11 (25.6)      | 96 (32.9)            | 53 (36.3)       |
| PR per RECIST or serological response per GCIG CA-125 criteria           | 53 (63.9)         | 32 (74.4)      | 196 (67.1)           | 93 (63.7)       |

<sup>a</sup>One patient (0.7%) in the placebo group with no prior bevacizumab use had a diagnosis of high-grade serous adenocarcinoma that was fallopian and/or ovarian in origin. <sup>b</sup>Bulky residual disease was defined as any lesion >2 cm. <sup>c</sup>No bulky residual disease was defined as no disease or all lesions ≤2 cm. <sup>d</sup>Tumor sample was not evaluable for percentage of genomic LOH due to low tumor content or low aneuploidy. <sup>e</sup>Bevacizumab maintenance therapy after the last treatment was not permitted.

CA-125, cancer antigen 125; CR, complete response; ECOG PS, Eastern Cooperative Oncology Group performance status; GCIG, Gynecologic Cancer InterGroup; LOH, loss of heterozygosity; PR, partial response; RECIST, Response Evaluation Criteria In Solid Tumors version 1.1.

**Supplementary Table 2. Summary of safety and treatment-emergent adverse events according to subgroups defined by (A) PFI following penultimate platinum-based chemotherapy regimen, (B) number of prior chemotherapy regimens, (C) prior bevacizumab use.**

**A. PFI following penultimate platinum-based chemotherapy regimen**

|                                                          | PFI 6–≤12 months               |                 |                  |                 | PFI >12 months                 |                 |                      |                 |
|----------------------------------------------------------|--------------------------------|-----------------|------------------|-----------------|--------------------------------|-----------------|----------------------|-----------------|
|                                                          | Rucaparib (n=150) <sup>a</sup> |                 | Placebo (n=76)   |                 | Rucaparib (n=222) <sup>b</sup> |                 | Placebo (n=113)      |                 |
| Treatment duration, median (range), mo                   | 6.7 (0–63)                     |                 | 4.1 (1–19)       |                 | 9.2 (0–67)                     |                 | 6.1 (0–68)           |                 |
| Patients with at least one TEAE                          | 150 (100)                      |                 | 74 (97.4)        |                 | 222 (100)                      |                 | 108 (95.6)           |                 |
| Patients with at least one grade ≥3 TEAE                 | 90 (60.0)                      |                 | 11 (14.5)        |                 | 141 (63.5)                     |                 | 20 (17.7)            |                 |
| Treatment interruption and/or dose reduction due to TEAE | 106 (70.7)                     |                 | 9 (11.8)         |                 | 165 (74.3)                     |                 | 11 (9.7)             |                 |
| Treatment interruption due to TEAE                       | 94 (62.7)                      |                 | 9 (11.8)         |                 | 154 (69.4)                     |                 | 10 (8.8)             |                 |
| Dose reduction due to TEAE                               | 84 (56.0)                      |                 | 4 (5.3)          |                 | 125 (56.3)                     |                 | 4 (3.5)              |                 |
| Discontinued due to TEAE <sup>c</sup>                    | 25 (16.7)                      |                 | 1 (1.3)          |                 | 39 (17.6)                      |                 | 2 (1.8)              |                 |
| Deaths due to TEAE <sup>c</sup>                          | 0                              |                 | 0                |                 | 6 (2.7) <sup>d</sup>           |                 | 1 (0.9) <sup>e</sup> |                 |
| Deaths due to disease progression                        | 1 (0.7)                        |                 | 1 (1.3)          |                 | 1 (0.5)                        |                 | 0                    |                 |
| <b>Most common (≥20%) TEAEs</b>                          | <b>Any grade</b>               | <b>Grade ≥3</b> | <b>Any grade</b> | <b>Grade ≥3</b> | <b>Any grade</b>               | <b>Grade ≥3</b> | <b>Any grade</b>     | <b>Grade ≥3</b> |
| Nausea                                                   | 113 (75.3)                     | 5 (3.3)         | 23 (30.3)        | 0               | 171 (77.0)                     | 9 (4.1)         | 47 (41.6)            | 1 (0.9)         |
| Asthenia/fatigue                                         | 110 (73.3)                     | 12 (8.0)        | 29 (38.2)        | 2 (2.6)         | 157 (70.7)                     | 17 (7.7)        | 56 (49.6)            | 3 (2.7)         |
| Constipation                                             | 58 (38.7)                      | 1 (0.7)         | 20 (26.3)        | 0               | 82 (36.9)                      | 6 (2.7)         | 24 (21.2)            | 2 (1.8)         |
| Dysgeusia                                                | 58 (38.7)                      | 0               | 3 (3.9)          | 0               | 90 (40.5)                      | 0               | 10 (8.8)             | 0               |
| Anemia/decreased hemoglobin                              | 55 (36.7)                      | 32 (21.3)       | 2 (2.6)          | 0               | 92 (41.4)                      | 51 (23.0)       | 7 (6.2)              | 1 (0.9)         |
| Diarrhea                                                 | 55 (36.7)                      | 3 (2.0)         | 18 (23.7)        | 1 (1.3)         | 74 (33.3)                      | 0               | 25 (22.1)            | 1 (0.9)         |
| Vomiting                                                 | 55 (36.7)                      | 5 (3.3)         | 14 (18.4)        | 1 (1.3)         | 84 (37.8)                      | 11 (5.0)        | 15 (13.3)            | 1 (0.9)         |
| ALT/AST increase                                         | 54 (36.0)                      | 11 (7.3)        | 1 (1.3)          | 0               | 79 (35.6)                      | 28 (12.6)       | 5 (4.4)              | 0               |
| Abdominal pain                                           | 51 (34.0)                      | 6 (4.0)         | 26 (34.2)        | 1 (1.3)         | 69 (31.1)                      | 6 (2.7)         | 24 (21.2)            | 0               |
| Thrombocytopenia/decreased platelet count                | 41 (27.3)                      | 10 (6.7)        | 3 (3.9)          | 0               | 70 (31.5)                      | 11 (5.0)        | 2 (1.8)              | 0               |
| Decreased appetite                                       | 39 (26.0)                      | 2 (1.3)         | 11 (14.5)        | 0               | 55 (24.8)                      | 1 (0.5)         | 14 (12.4)            | 0               |
| Headache                                                 | 36 (24.0)                      | 0               | 11 (14.5)        | 1 (1.3)         | 37 (16.7)                      | 1 (0.5)         | 20 (17.7)            | 0               |
| Neutropenia/decreased neutrophil count                   | 29 (19.3)                      | 11 (7.3)        | 2 (2.6)          | 0               | 47 (21.2)                      | 21 (9.5)        | 7 (6.2)              | 2 (1.8)         |

|                                                                                                                                                                                                                                                                                                                                                                                                                                                                                                                                                                                                                                                                                                                                                                                     |           |         |       |   |           |         |         |   |
|-------------------------------------------------------------------------------------------------------------------------------------------------------------------------------------------------------------------------------------------------------------------------------------------------------------------------------------------------------------------------------------------------------------------------------------------------------------------------------------------------------------------------------------------------------------------------------------------------------------------------------------------------------------------------------------------------------------------------------------------------------------------------------------|-----------|---------|-------|---|-----------|---------|---------|---|
| Photosensitivity reaction                                                                                                                                                                                                                                                                                                                                                                                                                                                                                                                                                                                                                                                                                                                                                           | 21 (14.0) | 1 (0.7) | 0 (0) | 0 | 47 (21.2) | 1 (0.5) | 1 (0.9) | 0 |
| <p><sup>a</sup>One patient did not receive a dose of rucaparib and is excluded from the safety population. <sup>b</sup>Two patients did not receive a dose of rucaparib and are excluded from the safety population. <sup>c</sup>Excluding disease progression. <sup>d</sup>Acute myeloid leukemia (n=1); cardiac arrest (n=1); hematophagic histiocytosis (n=1); myelodysplastic syndrome (n=2); unclassifiable high-grade B-cell lymphoma (n=1). <sup>e</sup>Pulmonary embolism (n=1).<br/>                 Data sorted by decreasing any-grade incidence in the rucaparib arm of the PFI 6–≤12 months subgroup.<br/>                 ALT, alanine aminotransferase; AST, aspartate aminotransferase; PFI, progression-free interval; TEAE, treatment-emergent adverse event.</p> |           |         |       |   |           |         |         |   |

## B. Number of prior chemotherapy regimens

|                                                          | Two prior chemotherapy regimens |                 |                      |                 | ≥3 Prior chemotherapy regimens |                 |                  |                 |
|----------------------------------------------------------|---------------------------------|-----------------|----------------------|-----------------|--------------------------------|-----------------|------------------|-----------------|
|                                                          | Rucaparib (n=229) <sup>a</sup>  |                 | Placebo (n=124)      |                 | Rucaparib (n=143) <sup>b</sup> |                 | Placebo (n=65)   |                 |
| Treatment duration, median (range), mo                   | 8.0 (0–61)                      |                 | 5.5 (0–68)           |                 | 9.0 (0–67)                     |                 | 5.3 (1–28)       |                 |
| Patients with at least one TEAE                          | 229 (100)                       |                 | 119 (96.0)           |                 | 143 (100)                      |                 | 63 (96.9)        |                 |
| Patients with at least one grade ≥3 TEAE                 | 142 (62.0)                      |                 | 23 (18.5)            |                 | 89 (62.2)                      |                 | 8 (12.3)         |                 |
| Treatment interruption and/or dose reduction due to TEAE | 164 (71.6)                      |                 | 13 (10.5)            |                 | 107 (74.8)                     |                 | 7 (10.8)         |                 |
| Treatment interruption due to TEAE                       | 152 (66.4)                      |                 | 12 (9.7)             |                 | 96 (67.1)                      |                 | 7 (10.8)         |                 |
| Dose reduction due to TEAE                               | 126 (55.0)                      |                 | 5 (4.0)              |                 | 83 (58.0)                      |                 | 3 (4.6)          |                 |
| Discontinued due to TEAE <sup>c</sup>                    | 36 (15.7)                       |                 | 2 (1.6)              |                 | 28 (19.6)                      |                 | 1 (1.5)          |                 |
| Deaths due to TEAE <sup>c</sup>                          | 3 (1.3) <sup>d</sup>            |                 | 1 (0.8) <sup>e</sup> |                 | 3 (2.1) <sup>f</sup>           |                 | 0                |                 |
| Deaths due to disease progression                        | 1 (0.4)                         |                 | 0                    |                 | 1 (0.7)                        |                 | 1 (1.5)          |                 |
| <b>Most common (≥20%) TEAEs</b>                          | <b>Any grade</b>                | <b>Grade ≥3</b> | <b>Any grade</b>     | <b>Grade ≥3</b> | <b>Any grade</b>               | <b>Grade ≥3</b> | <b>Any grade</b> | <b>Grade ≥3</b> |
| Nausea                                                   | 172 (75.1)                      | 8 (3.5)         | 45 (36.3)            | 0               | 112 (78.3)                     | 6 (4.2)         | 25 (38.5)        | 1 (1.5)         |
| Asthenia/fatigue                                         | 156 (68.1)                      | 20 (8.7)        | 51 (41.1)            | 4 (3.2)         | 111 (77.6)                     | 9 (6.3)         | 34 (52.3)        | 1 (1.5)         |
| Dysgeusia                                                | 97 (42.4)                       | 0               | 11 (8.9)             | 0               | 51 (35.7)                      | 0               | 2 (3.1)          | 0               |
| Anemia/decreased hemoglobin                              | 93 (40.6)                       | 57 (24.9)       | 6 (4.8)              | 0               | 54 (37.8)                      | 26 (18.2)       | 3 (4.6)          | 1 (1.5)         |
| Constipation                                             | 93 (40.6)                       | 7 (3.1)         | 25 (20.2)            | 1 (0.8)         | 47 (32.9)                      | 0               | 19 (29.2)        | 1 (1.5)         |
| Vomiting                                                 | 87 (38.0)                       | 11 (4.8)        | 16 (12.9)            | 0               | 52 (36.4)                      | 5 (3.5)         | 13 (20.0)        | 2 (3.1)         |
| Abdominal pain                                           | 85 (37.1)                       | 8 (3.5)         | 33 (26.6)            | 1 (0.8)         | 35 (24.5)                      | 4 (2.8)         | 17 (26.2)        | 0               |
| ALT/AST increase                                         | 80 (34.9)                       | 22 (9.6)        | 4 (3.2)              | 0               | 53 (37.1)                      | 17 (11.9)       | 2 (3.1)          | 0               |
| Diarrhea                                                 | 71 (31.0)                       | 1 (0.4)         | 29 (23.4)            | 1 (0.8)         | 58 (40.6)                      | 2 (1.4)         | 14 (21.5)        | 1 (1.5)         |
| Thrombocytopenia/decreased platelet count                | 68 (29.7)                       | 9 (3.9)         | 4 (3.2)              | 0               | 43 (30.1)                      | 12 (8.4)        | 1 (1.5)          | 0               |
| Decreased appetite                                       | 60 (26.2)                       | 2 (0.9)         | 14 (11.3)            | 0               | 34 (23.8)                      | 1 (0.7)         | 11 (16.9)        | 0               |
| Neutropenia/decreased neutrophil count                   | 51 (22.3)                       | 23 (10.0)       | 5 (4.0)              | 0               | 25 (17.5)                      | 9 (6.3)         | 4 (6.2)          | 2 (3.1)         |
| Blood creatinine increased                               | 47 (20.5)                       | 1 (0.4)         | 3 (2.4)              | 0               | 17 (11.9)                      | 0               | 0                | 0               |
| Headache                                                 | 47 (20.5)                       | 1 (0.4)         | 20 (16.1)            | 0               | 26 (18.2)                      | 0               | 11 (16.9)        | 1 (1.5)         |

<sup>a</sup>Two patients did not receive a dose of rucaparib and are excluded from the safety population. <sup>b</sup>One patient did not receive a dose of rucaparib and is excluded from the safety population.  
<sup>c</sup>Excluding disease progression. <sup>d</sup>Hematophagic histiocytosis (n=1); cardiac arrest (n=1); myelodysplastic syndrome (n=1). <sup>e</sup>Pulmonary embolism (n=1). <sup>f</sup>Acute myeloid leukemia (n=1); unclassifiable high-grade B-cell lymphoma (n=1); myelodysplastic syndrome (n=1).  
Data sorted by decreasing any-grade incidence in the rucaparib arm of the 2 prior chemotherapy regimens subgroup.  
ALT, alanine aminotransferase; AST, aspartate aminotransferase; TEAE, treatment-emergent adverse event.

## C. Prior bevacizumab use

|                                                          | Prior bevacizumab    |                 |                  |                 | No prior bevacizumab           |                 |                      |                 |
|----------------------------------------------------------|----------------------|-----------------|------------------|-----------------|--------------------------------|-----------------|----------------------|-----------------|
|                                                          | Rucaparib (n=83)     |                 | Placebo (n=43)   |                 | Rucaparib (n=289) <sup>a</sup> |                 | Placebo (n=146)      |                 |
| Treatment duration, median (range), mo                   | 7.9 (0–55)           |                 | 4.6 (1–30)       |                 | 8.4 (0–67)                     |                 | 5.5 (0–68)           |                 |
| Patients with at least one TEAE                          | 83 (100)             |                 | 40 (93.0)        |                 | 289 (100)                      |                 | 142 (97.3)           |                 |
| Patients with at least one grade ≥3 TEAE                 | 58 (69.9)            |                 | 5 (11.6)         |                 | 173 (59.9)                     |                 | 26 (17.8)            |                 |
| Treatment interruption and/or dose reduction due to TEAE | 70 (84.3)            |                 | 2 (4.7)          |                 | 201 (69.6)                     |                 | 18 (12.3)            |                 |
| Treatment interruption due to TEAE                       | 65 (78.3)            |                 | 2 (4.7)          |                 | 183 (63.3)                     |                 | 17 (11.6)            |                 |
| Dose reduction due to TEAE                               | 52 (62.7)            |                 | 0                |                 | 157 (54.3)                     |                 | 8 (5.5)              |                 |
| Discontinued due to TEAE <sup>b</sup>                    | 13 (15.7)            |                 | 0                |                 | 51 (17.6)                      |                 | 3 (2.1)              |                 |
| Deaths due to TEAE <sup>b</sup>                          | 2 (2.4) <sup>c</sup> |                 | 0                |                 | 4 (1.4) <sup>d</sup>           |                 | 1 (0.7) <sup>e</sup> |                 |
| Deaths due to disease progression                        | 1 (1.2)              |                 | 0                |                 | 1 (0.3)                        |                 | 1 (0.7)              |                 |
| <b>Most common (≥20%) TEAEs</b>                          | <b>Any grade</b>     | <b>Grade ≥3</b> | <b>Any grade</b> | <b>Grade ≥3</b> | <b>Any grade</b>               | <b>Grade ≥3</b> | <b>Any grade</b>     | <b>Grade ≥3</b> |
| Asthenia/fatigue                                         | 65 (78.3)            | 8 (9.6)         | 16 (37.2)        | 0               | 202 (69.9)                     | 21 (7.3)        | 69 (47.3)            | 5 (3.4)         |
| Nausea                                                   | 64 (77.1)            | 5 (6.0)         | 13 (30.2)        | 0               | 220 (76.1)                     | 9 (3.1)         | 57 (39.0)            | 1 (0.7)         |
| Anemia/decreased hemoglobin                              | 39 (47.0)            | 24 (28.9)       | 1 (2.3)          | 0               | 108 (37.4)                     | 59 (20.4)       | 8 (5.5)              | 1 (0.7)         |
| Diarrhea                                                 | 35 (42.2)            | 1 (1.2)         | 9 (20.9)         | 1 (2.3)         | 94 (32.5)                      | 2 (0.7)         | 34 (23.3)            | 1 (0.7)         |
| Dysgeusia                                                | 34 (41.0)            | 0               | 4 (9.3)          | 0               | 114 (39.4)                     | 0               | 9 (6.2)              | 0               |
| Vomiting                                                 | 33 (39.8)            | 3 (3.6)         | 6 (14.0)         | 0               | 106 (36.7)                     | 13 (4.5)        | 23 (15.8)            | 2 (1.4)         |
| Abdominal pain                                           | 31 (37.3)            | 0               | 16 (37.2)        | 0               | 89 (30.8)                      | 12 (4.2)        | 34 (23.3)            | 1 (0.7)         |
| Thrombocytopenia/decreased platelet count                | 29 (34.9)            | 6 (7.2)         | 0                | 0               | 82 (28.4)                      | 15 (5.2)        | 5 (3.4)              | 0               |
| ALT/AST increase                                         | 28 (33.7)            | 9 (10.8)        | 1 (2.3)          | 0               | 105 (36.3)                     | 30 (10.4)       | 5 (3.4)              | 0               |
| Constipation                                             | 20 (24.1)            | 0               | 12 (27.9)        | 1 (2.3)         | 120 (41.5)                     | 7 (2.4)         | 32 (21.9)            | 1 (0.7)         |
| Headache                                                 | 20 (24.1)            | 0               | 7 (16.3)         | 0               | 53 (18.3)                      | 1 (0.3)         | 24 (16.4)            | 1 (0.7)         |
| Blood creatinine increased                               | 19 (22.9)            | 1 (1.2)         | 0                | 0               | 45 (15.6)                      | 0               | 3 (2.1)              | 0               |
| Neutropenia/decreased neutrophil count                   | 19 (22.9)            | 9 (10.8)        | 1 (2.3)          | 0               | 57 (19.7)                      | 23 (8.0)        | 8 (5.5)              | 2 (1.4)         |
| Photosensitivity reaction                                | 18 (21.7)            | 2 (2.4)         | 0                | 0               | 50 (17.3)                      | 0               | 1 (0.7)              | 0               |
| Cough                                                    | 16 (19.3)            | 0               | 9 (20.9)         | 0               | 50 (17.3)                      | 0               | 16 (11.0)            | 0               |
| Decreased appetite                                       | 16 (19.3)            | 0               | 2 (4.7)          | 0               | 78 (27.0)                      | 3 (1.0)         | 23 (15.8)            | 0               |

<sup>a</sup>Three patients did not receive a dose of rucaparib and are excluded from the safety population. <sup>b</sup>Excluding disease progression. <sup>c</sup>Cardiac arrest (n=1); unclassifiable high-grade B-cell lymphoma (n=1). <sup>d</sup>Acute myeloid leukemia (n=1); hematophagic histiocytosis (n=1); myelodysplastic syndrome (n=2). <sup>e</sup>Pulmonary embolism (n=1).  
Data sorted by decreasing any-grade incidence in the rucaparib arm of the prior bevacizumab subgroup.  
ALT, alanine aminotransferase; AST, aspartate aminotransferase; TEAE, treatment-emergent adverse event.



**Supplementary Figure 1. Blinded independent central review-assessed progression-free survival across prespecified, nested cohorts in patients with progression-free interval following penultimate platinum-based regimen of (A–C) 6–≤12 months or (D–F) >12 months.<sup>a</sup> P values are presented for descriptive purposes only.**

**A. BRCA mutant**

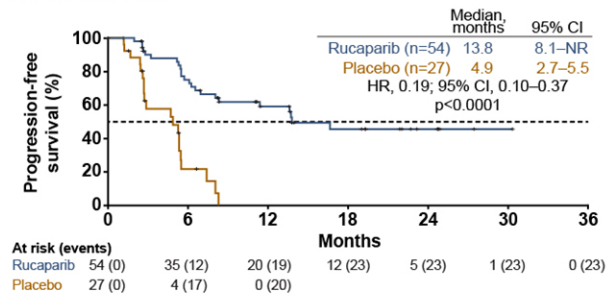

**D. BRCA mutant**

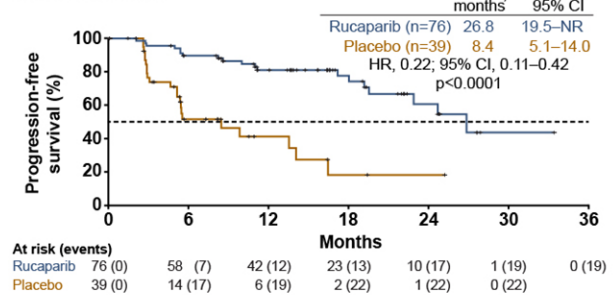

**B. HRD**

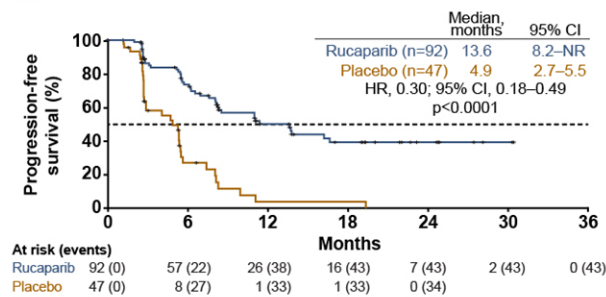

**E. HRD**

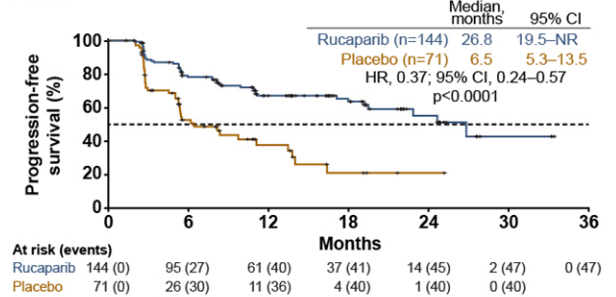

**C. ITT**

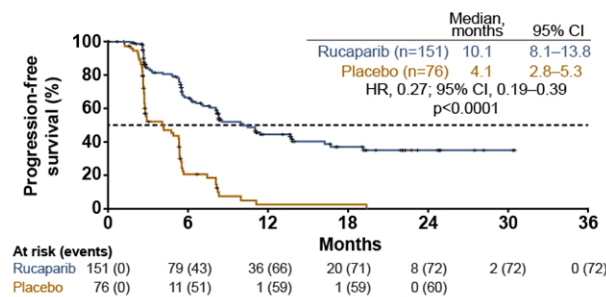

**F. ITT**

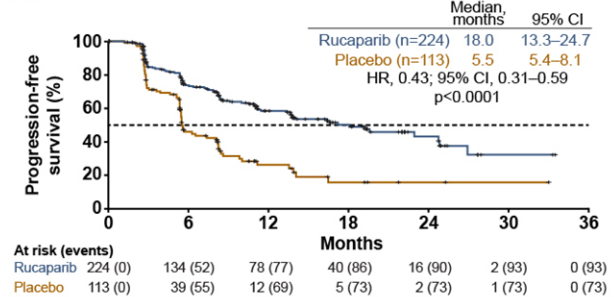

<sup>a</sup>P values were nonsignificant for treatment by progression-free interval following penultimate platinum-based regimen subgroup (6–≤12 months vs >12 months) interaction tests (*BRCA* mutant cohort,  $p=0.7138$ ; HRD cohort,  $p=0.6459$ ; ITT population,  $p=0.1041$ ). The dashed line indicates the median value of progression-free survival. HR, hazard ratio; HRD, homologous recombination deficiency; ITT, intent to treat; PFI, progression-free interval.

**Supplementary Figure 2. Blinded independent central review-assessed progression-free survival across the prespecified, nested cohorts in patients with (A–C) 2 prior chemotherapy regimens or (D–F) ≥3 prior chemotherapy regimens.<sup>a</sup> P values are presented for descriptive purposes only.**

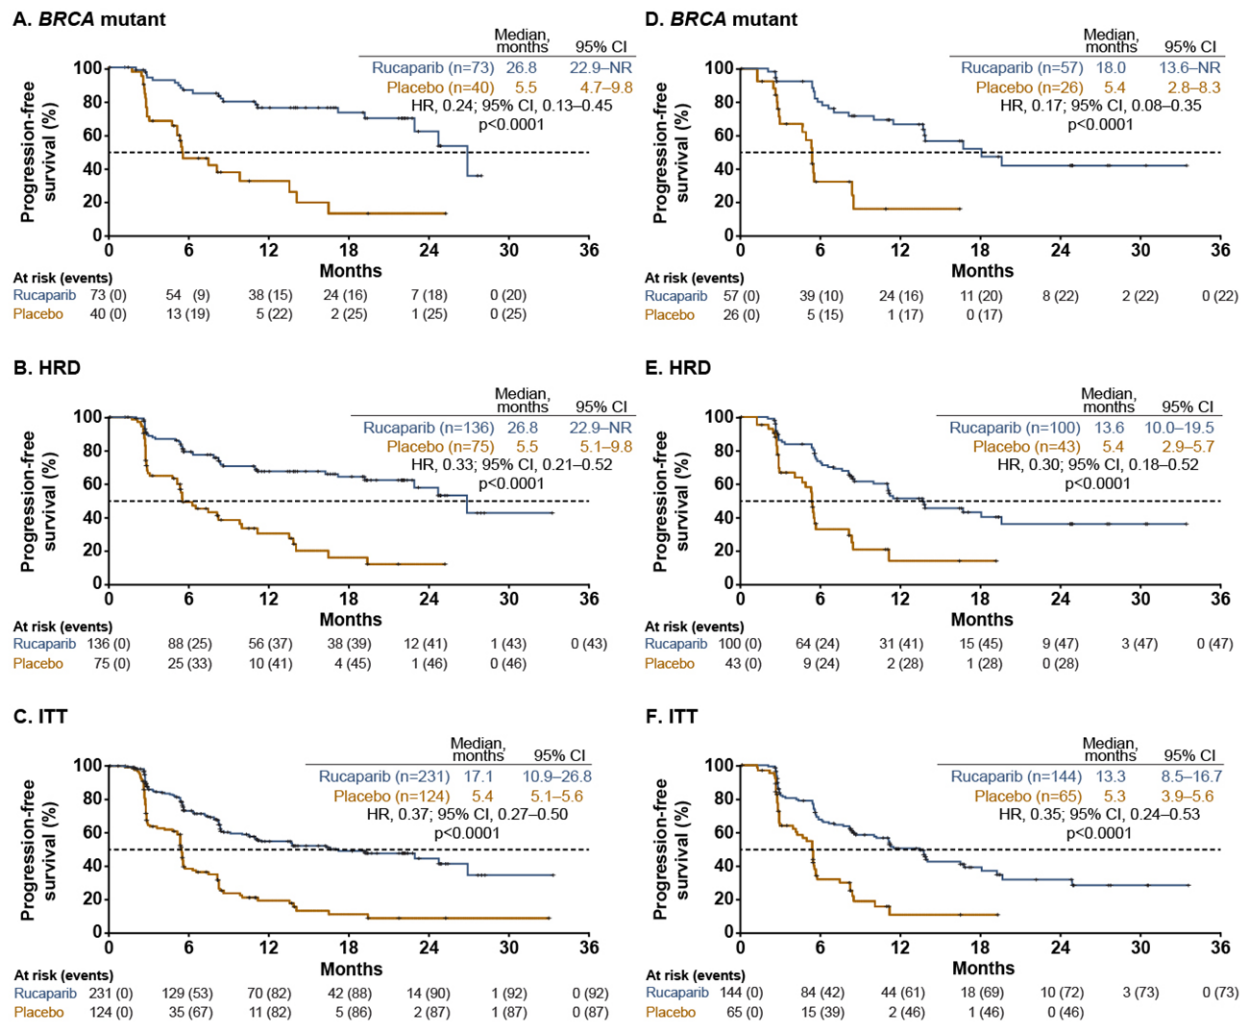

<sup>a</sup>P values were nonsignificant for treatment by the number of prior chemotherapy regimens subgroup (2 vs ≥3) interaction tests (BRCA mutant cohort, p=0.7660; HRD cohort, p=0.9215; ITT population, p=0.9627).

The dashed line indicates the median value of progression-free survival.

HR, hazard ratio; HRD, homologous recombination deficiency; ITT, intent to treat.

**Supplementary Figure 3. Blinded independent central review-assessed progression-free survival across the prespecified, nested cohorts in patients with (A–C) prior bevacizumab use or (D–F) no prior bevacizumab use.<sup>a</sup> P values are presented for descriptive purposes only.**

**A. BRCA mutant**

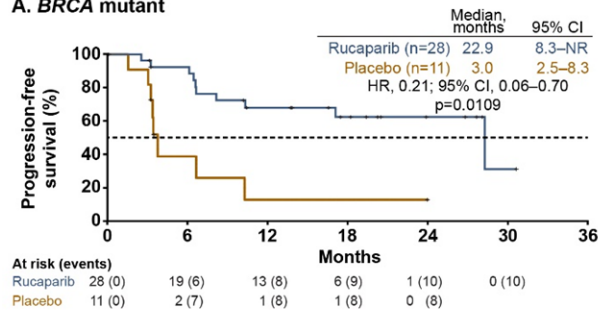

**D. BRCA mutant**

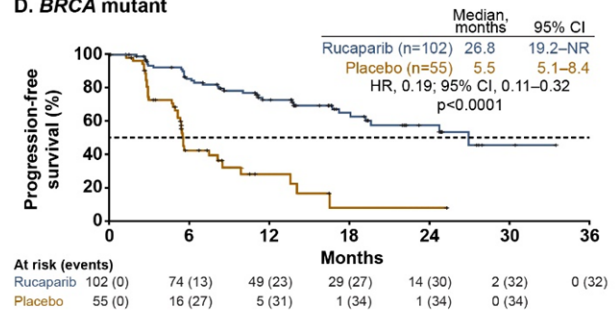

**B. HRD**

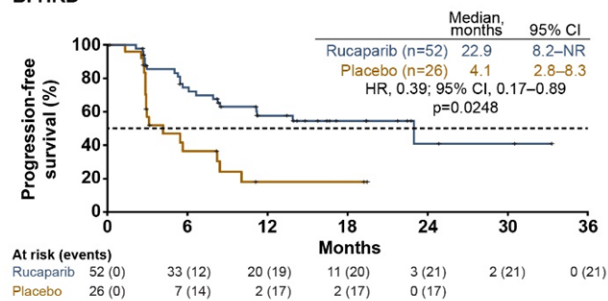

**E. HRD**

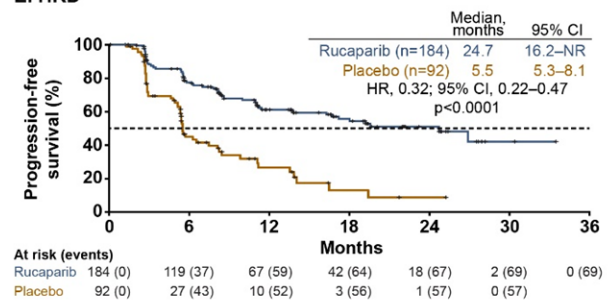

**C. ITT**

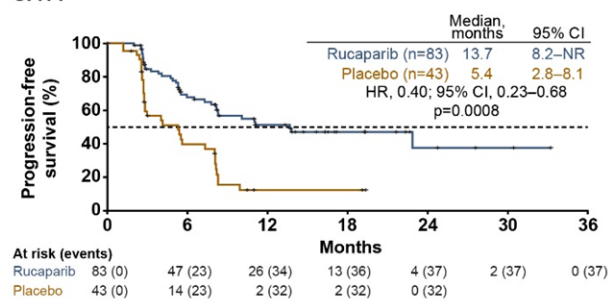

**F. ITT**

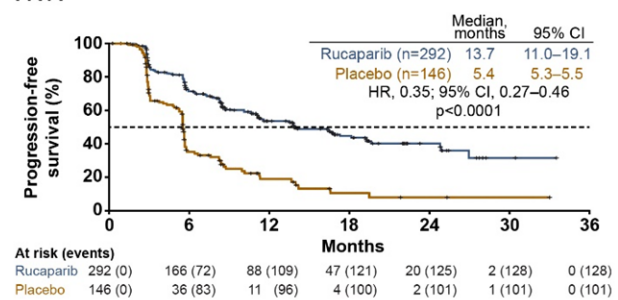

<sup>a</sup>P values were nonsignificant for treatment by prior bevacizumab use subgroup (yes vs no) interaction tests (BRCA mutant cohort, p=0.9683; HRD cohort, p=0.9897; ITT population, p=0.8427).

The dashed line indicates the median value of progression-free survival.

HR, hazard ratio; HRD, homologous recombination deficiency; ITT, intent to treat.

**Supplementary Figure 4. Investigator-assessed progression-free survival in the exploratory cohort of patients with progression-free interval following penultimate platinum-based regimen of >24 months. P values are presented for descriptive purposes only.**

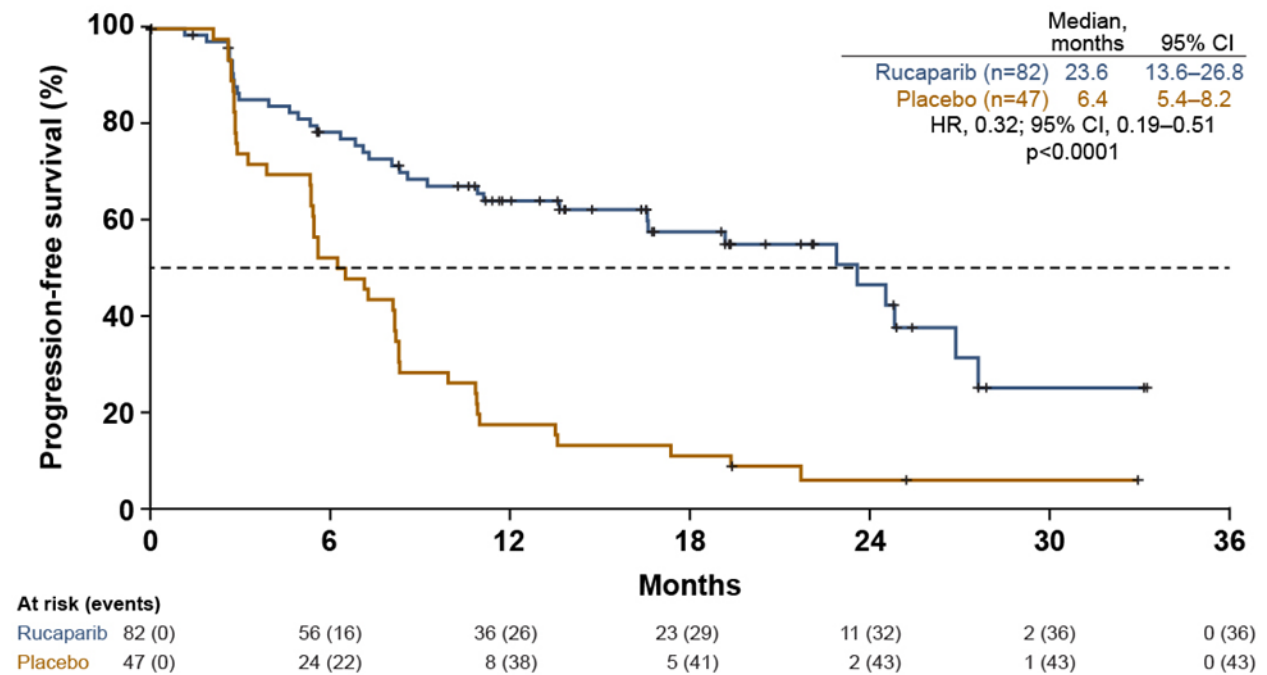

Log-rank analysis was performed by randomization strata for HRD classification by clinical trial assay, best response, and penultimate platinum progression-free interval. The dashed line indicates the median value of progression-free survival. HR, hazard ratio; HRD, homologous recombination deficiency.
